# Supplementary material for: Myocarditis and Pericarditis following COVID-19 Vaccination in Thailand
Source: MDPI journal article supplement (doi:10.3390/vaccines11040749), 2023-03-28
Supplement: s1 [file s1]

Supplementary Table.

Table S1. Characteristics of myocarditis, pericarditis and myopericarditis following COVID-19 immunization in Thailand (n=199).

|                                                        | Myocarditis<br>1<br>(n=130) | Pericarditis<br>2<br>(n=44) | Myopericarditis<br>3<br>(n=25) | P-value<br>1 vs 2 | P-value<br>1 vs 3 | P-value<br>2 vs 3 |
|--------------------------------------------------------|-----------------------------|-----------------------------|--------------------------------|-------------------|-------------------|-------------------|
| <b>Reported age, No.</b>                               | 129                         | 44                          | 24                             | 0.4138            | 0.8831            | 0.8918            |
| Age, median (IQR), y                                   | 14 (13-17)                  | 15 (13-17)                  | 15 (13-16)                     |                   |                   |                   |
| <b>Reported onset, No.</b>                             | 128                         | 43                          | 25                             | 0.3265            | 0.6102            | 0.9287            |
| Time to symptom onset, median (IQR),<br>d              | 2 (1-4)                     | 2 (1-5)                     | 2 (1-5)                        |                   |                   |                   |
| <b>Reported gender, No.</b>                            | 130                         | 44                          | 25                             | 0.011             | 0.009             | 0.500             |
| Male (%)                                               | 79 (61)                     | 36 (82)                     | 22 (88)                        |                   |                   |                   |
| Female (%)                                             | 51 (39)                     | 18 (8)                      | 3 (12)                         |                   |                   |                   |
| <b>Reported occupation, No.</b>                        | 101                         | 41                          | 22                             | 0.437             | 0.731             | 0.407             |
| Occupation (%)                                         |                             |                             |                                |                   |                   |                   |
| student                                                | 87 (86)                     | 32 (78)                     | 21 (95)                        |                   |                   |                   |
| HCP                                                    | 1 (1)                       | 0 (0)                       | 1 (5)                          |                   |                   |                   |
| monk                                                   | 1 (1)                       | 1 (2)                       | 0 (0)                          |                   |                   |                   |
| Government officer                                     | 0 (0)                       | 2 (5)                       | 0 (0)                          |                   |                   |                   |
| merchant                                               | 3 (3)                       | 1 (2)                       | 0 (0)                          |                   |                   |                   |
| unemployed                                             | 2 (2)                       | 1 (2)                       | 0 (0)                          |                   |                   |                   |
| housework                                              | 1 (1)                       | 1 (2)                       | 0 (0)                          |                   |                   |                   |
| employee                                               | 4 (4)                       | 3 (7)                       | 0 (0)                          |                   |                   |                   |
| farmer                                                 | 2 (2)                       | 0 (0)                       | 0 (0)                          |                   |                   |                   |
| <b>Reported history of COVID-19<br/>infection, No.</b> | 130                         | 44                          | 25                             | 0.309             | 0.443             | -                 |
| No                                                     | 127 (98)                    | 44 (100)                    | 25 (100)                       |                   |                   |                   |
| Yes                                                    | 3 (2)                       | 0 (0)                       | 0 (0)                          |                   |                   |                   |
| <b>Reported vaccine type, No.</b>                      | 130                         | 44                          | 25                             | 0.434             | 0.266             | 0.825             |
| ChAdOx1-nCoV                                           | 15 (11)                     | 4 (9)                       | 1 (4)                          |                   |                   |                   |
| BNT162b2                                               | 104 (80)                    | 38 (87)                     | 22 (88)                        |                   |                   |                   |
| BBIBP-CorV                                             | 1 (1)                       | 1 (2)                       | 1 (4)                          |                   |                   |                   |
| CoronaVac                                              | 2 (2)                       | 1 (2)                       | 1 (4)                          |                   |                   |                   |
| mRNA-1273                                              | 8 (6)                       | 0 (0)                       | 0 (0)                          |                   |                   |                   |
| <b>Reported dose, No.</b>                              | 130                         | 44                          | 25                             | 0.331             | 0.213             | 0.182             |
| Dose 1                                                 | 39 (30)                     | 15 (34)                     | 12 (48)                        |                   |                   |                   |
| Dose 2                                                 | 85 (65)                     | 29 (66)                     | 12 (48)                        |                   |                   |                   |
| Dose 3                                                 | 6 (5)                       | 0 (0)                       | 1 (4)                          |                   |                   |                   |
| <b>Report prognosis, No.</b>                           | 100                         | 34                          | 21                             | 0.394             | 0.431             | 0.234             |
| Status <sup>§</sup> (%)                                |                             |                             |                                |                   |                   |                   |
| full recovery                                          | 33 (33)                     | 9 (26)                      | 10 (47)                        |                   |                   |                   |
| better                                                 | 59 (59)                     | 24 (71)                     | 10 (47)                        |                   |                   |                   |
| death                                                  | 8 (8)                       | 1 (3)                       | 1 (5)                          |                   |                   |                   |
| <b>Report hospitalization, No.</b>                     | 128                         | 44                          | 25                             | 0.909             | 0.265             | 0.296             |
| hospitalization (%)                                    |                             |                             |                                |                   |                   |                   |
| IPD                                                    | 101 (79)                    | 35 (79)                     | 23 (92)                        |                   |                   |                   |

---

  

|                                        | Myocarditis<br>1<br>(n=130) | Pericarditis<br>2<br>(n=44) | Myopericarditis<br>3<br>(n=25) | P-value<br>1 vs 2 | P-value<br>1 vs 3 | P-value<br>2 vs 3 |
|----------------------------------------|-----------------------------|-----------------------------|--------------------------------|-------------------|-------------------|-------------------|
| OPD                                    | 20 (16)                     | 6 (14)                      | 2 (8)                          |                   |                   |                   |
| ER                                     | 7 (5)                       | 3 (7)                       | 0 (0)                          |                   |                   |                   |
| <b>Reported hospital duration, No.</b> | 59                          | 17                          | 14                             | 0.2838            | 0.3339            | 0.9725            |
| hospital duration, median (IQR), d     | 2 (1-4)                     | 2 (1-3)                     | 2 (1-3)                        |                   |                   |                   |

**Table S2.** Characteristic of myocarditis/ pericarditis cases from medical records review.

|                                             | ChAdOx1-nCoV | BNT162b2  | BBIBP-CorV | CoronaVac | MRNA-1273 |
|---------------------------------------------|--------------|-----------|------------|-----------|-----------|
| <b>Reported Age (n=71)</b>                  | 10           | 57        | 2          | 2         | 0         |
| Median age (IQR), year                      | 56(41-67)    | 14(13-16) | 40(33-47)  | 23(21-24) | -         |
| <b>Reported Underlying disease (n=67)</b>   | 9            | 54        | 2          | 2         | 0         |
| No underlying disease                       | 4(44.44)     | 49(90.74) | 2(100)     | 1(50)     | 0(0)      |
| Have underlying disease                     | 5(55.56)     | 5(9.26)   | 0(0)       | 1(50)     | 0(0)      |
| HIV infection                               | 1(20)        | 1(20)     | 0(0)       | 0(0)      | 0(0)      |
| Diabetes                                    | 2(40)        | 0(0)      | 0(0)       | 0(0)      | 0(0)      |
| Hypertension                                | 3(60)        | 0(0)      | 0(0)       | 1(100)    | 0(0)      |
| Dyslipidemia                                | 2(40)        | 0(0)      | 0(0)       | 0(0)      | 0(0)      |
| Gout                                        | 1(20)        | 0(0)      | 0(0)       | 0(0)      | 0(0)      |
| Panic disorder                              | 1(20)        | 0(0)      | 0(0)       | 0(0)      | 0(0)      |
| G6PD deficiency                             | 0(0)         | 1(20)     | 0(0)       | 0(0)      | 0(0)      |
| Asthma                                      | 1(20)        | 1(20)     | 0(0)       | 0(0)      | 0(0)      |
| Ischemic heart disease                      | 0(0)         | 1(20)     | 0(0)       | 0(0)      | 0(0)      |
| chronic pelvic pain                         | 0(0)         | 1(20)     | 0(0)       | 0(0)      | 0(0)      |
| psychiatric                                 | 1(20)        | 0(0)      | 0(0)       | 0(0)      | 0(0)      |
| thyrotoxicosis                              | 0(0)         | 0(0)      | 0(0)       | 1(100)    | 0(0)      |
| <b>Previous AEFI history (n=51)</b>         | 5            | 45        | 0          | 1         | 0         |
| No                                          | 5(100)       | 44(97.78) | 0(0)       | 1(100)    | 0(0)      |
| Yes                                         | 0(0)         | 1(2.22)   | 0(0)       | 0(0)      | 0(0)      |
| <b>History drug/ vaccine allergy (n=59)</b> | 8            | 50        | 0          | 1         | 0         |
| No                                          | 8(100)       | 45(90)    | 0(0)       | 1(100)    | 0(0)      |
| Yes                                         | 0(0)         | 5(10)     | 0(0)       | 0(0)      | 0(0)      |
| <b>Symptoms (n=71)</b>                      | 10           | 57        | 2          | 2         | 0         |
| chest pain                                  | 6(60)        | 56(98.25) | 2(100)     | 1(50)     | 0         |
| Fever                                       | 3(30)        | 22(38.6)  | 0(0)       | 0(0)      | 0         |
| tachycardia                                 | 3(30)        | 21(36.84) | 0(0)       | 0(0)      | 0         |
| Dyspnea                                     | 4(40)        | 18(31.58) | 0(0)       | 2(100)    | 0         |
| Palpitation                                 | 3(30)        | 12(21.05) | 0(0)       | 1(50)     | 0         |
| vomiting                                    | 1(10)        | 4(7.02)   | 0(0)       | 0(0)      | 0         |
| headache                                    | 1(10)        | 4(7.02)   | 0(0)       | 0(0)      | 0         |
| syncope                                     | 3(30)        | 2(3.51)   | 0(0)       | 0(0)      | 0         |
| lethargy                                    | 1(10)        | 2(3.51)   | 0(0)       | 0(0)      | 0         |
| seizure                                     | 2(20)        | 2(3.51)   | 0(0)       | 1(50)     | 0         |
| diarrhea                                    | 0(0)         | 2(3.51)   | 0(0)       | 0(0)      | 0         |
| sweating                                    | 1(10)        | 1(1.75)   | 0(0)       | 0(0)      | 0         |
| <b>Abnormal finding</b>                     |              |           |            |           |           |
| <b>Troponin level (n=49)</b>                | 5            | 41        | 2          | 1         | 0         |
| Elevated                                    | 3(60)        | 25(60.98) | 2(100)     | 1(100)    | 31(63.27) |

|                                         |          |           |        |        |           |
|-----------------------------------------|----------|-----------|--------|--------|-----------|
| normal                                  | 2(40)    | 16(39.02) | 0(0)   | 0(0)   | 18(36.73) |
| <b>Electrocardiogram (EKG) (n=54)</b>   | 7        | 44        | 2      | 1      | 0         |
| <i>new ST-elevation/ PR-depression</i>  | 2(28.57) | 16(36.36) | 1(50)  | 0(0)   | 0(0)      |
| other abnormal                          | 3(42.86) | 11(25)    | 0(0)   | 1(100) | 0(0)      |
| normal                                  | 2(28.57) | 17(38.64) | 1(50)  | 0(0)   | 0(0)      |
| <b>Echocardiogram (n=23)</b>            | 3        | 17        | 2      | 1      | 0         |
| Abnormal cardiac function               | 2(66.67) | 3(17.65)  | 0(0)   | 0(0)   | 0(0)      |
| Normal                                  | 1(33.33) | 14(82.35) | 2(100) | 1(100) | 0(0)      |
| <b>Magnetic resonance imaging (n=5)</b> | 1        | 3         | 1      | 0      | 0         |
| abnormal                                | 1(100)   | 3(100)    | 1(100) | 0(0)   | 0(0)      |
| normal                                  | 0(0)     | 0(0)      | 0(0)   | 0(0)   | 0(0)      |

**Table S3.** Multivariable logistic regression analysis to estimate the odds of confirmed (n=18) and probable (n=26) cases of myocarditis/ pericarditis following COVID-19 vaccine.

| parameter           | Adjusted Odds ratio | P-value | 95% CI      |
|---------------------|---------------------|---------|-------------|
| <b>Gender</b>       |                     |         |             |
| Male                | 1.99                | 0.186   | 0.72-5.53   |
| Female              | reference           |         |             |
| <b>age group</b>    |                     |         |             |
| 12-17 y             | 26.77               | 0.001   | 3.84-186.65 |
| 18-60 y             | 1.07                | 0.937   | 0.20-5.68   |
| >60 y               | reference           |         |             |
| <b>vaccine type</b> |                     |         |             |
| BNT162b2            | 18.72               | 0.015   | 1.77-198.16 |
| MRNA-1273*          | -                   | -       | -           |
| ChAdOx1-nCoV        | 3.23                | 0.296   | 0.36-29.18  |
| BBIBP-CorV*         | -                   | -       | -           |
| CoronaVac           | reference           |         |             |

\*No confirmed/ probable case reported on MRNA-1273 and BBIBP-CorV.

**Table S4.** Multivariable logistic regression analysis to estimate the odds of myocarditis/ pericarditis following COVID-19 vaccine adjusted for period of vaccination.

| Parameter                     | Adjusted Odds ratio | P-value | 95% CI      |
|-------------------------------|---------------------|---------|-------------|
| <b>Gender</b>                 |                     |         |             |
| Male                          | 1.60                | 0.200   | 0.78-3.30   |
| Female                        | reference           |         |             |
| <b>Age group</b>              |                     |         |             |
| 12-17 y                       | 15.22               | <0.001  | 4.01-57.80  |
| 18-20 y                       | 3.27                | 0.085   | 0.85-12.60  |
| 21-60 y                       | 0.29                | 0.021   | 0.10-0.83   |
| >60 y                         | reference           |         |             |
| <b>Vaccine type</b>           |                     |         |             |
| BNT162b2                      | 6.53                | 0.076   | 0.82-52.10  |
| mRNA-1273                     | 34.48               | 0.004   | 3.02-394.20 |
| ChAdOx1-nCoV                  | 2.38                | 0.361   | 0.37-15.24  |
| CoronaVac                     | reference           |         |             |
| <b>Period of vaccination*</b> |                     |         |             |
| Mar-May                       | reference           |         |             |
| Jun-Sep                       | 0.57                | 0.657   | 0.05-6.64   |
| Oct-Dec                       | 2.15                | 0.559   | 0.17-27.77  |

\* During the 10 months of the COVID-19 vaccination campaign, we have divided into 3 time periods according to the vaccine introduction including March – May, June – September, and October – December.
